# Supplementary material for: Pharmacokinetic Comparisons of Mangiferin and Mangiferin Monosodium Salt in Rat Plasma by UPLC-MS/MS
Source: Hindawi journal article supplement (doi:10.1155/2019/9272710), 2019-11-14
Supplement: f1 [file 9272710.f1.pdf]

## Supplementary Materials

**Table S1:** Dilution reliability of MG in rat plasma ( $\bar{x} \pm s$ , ng/mL)

**Table S2:** Carryover of MG and MG-Na in rat plasma ( $\bar{x} \pm s$ , ng/mL)

**Table S3:** Mean Noncompartmental Pharmacokinetic parameters of MG and MG-Na ( $\bar{x} \pm s$ )

**Figure S1:** The synthesis procedures for MG-Na.

**Figure S2:** Blank plasma (A), blank plasma + standard solution of MG or MG-Na (LLOQ, 1.0 ng/mL) + IS standard working solution (100 ng/mL) (B), plasma after oral administration MG or MG-Na for 120 minutes (C)

**Figure S3:** The calibration curves of MG and MG-Na (ng/mL).

**Figure S4:** The plasma concentration-time curve of MG and MG-Na in a single one.

**Table S1:** Dilution reliability of MG in rat plasma ( $\bar{x} \pm s$ , ng/mL)

|       | Plasma sample | Dilution stability   |         |        |
|-------|---------------|----------------------|---------|--------|
|       |               | Means concentration  | RSD (%) | RE (%) |
| MG    | 10            | 10.417 $\pm$ 0.321   | 3.1     | 4.2    |
|       | 100           | 103.837 $\pm$ 4.753  | 4.6     | 3.8    |
|       | 500           | 492.575 $\pm$ 21.581 | 4.4     | -1.5   |
| MG-Na | 10            | 10.298 $\pm$ 0.419   | 4.1     | 3.0    |
|       | 100           | 98.285 $\pm$ 5.391   | 5.5     | -1.7   |
|       | 500           | 504.519 $\pm$ 7.981  | 1.6     | 0.9    |

\* $P < 0.05$ , indicates significant differences from the MG.

\*\* $P < 0.01$ , indicates highly significant differences from the MG.

**Table S2:** Carryover of MG and MG-Na in rat plasma ( $\bar{x} \pm s$ , ng/mL)

|       | Plasma sample | Means cconcentration | RSD (%) | RE (%) |
|-------|---------------|----------------------|---------|--------|
| MG    | 0             | 0.073 $\pm$ 0.006    | 8.2     | 7.3    |
|       | 500           | 493.432 $\pm$ 13.491 | 2.7     | -1.3   |
| MG-Na | 0             | 0.063 $\pm$ 0.007    | 9.5     | 6.3    |
|       | 500           | 491.392 $\pm$ 14.421 | 2.9     | -1.7   |

\* $P < 0.05$ , indicates significant differences from the MG.

\*\* $P < 0.01$ , indicates highly significant differences from the MG.

**Table S3:** Mean Noncompartmental Pharmacokinetic parameters of MG and MG-Na ( $\bar{x} \pm s$ )

| Parameter                            | MG                           | MG-Na                           |
|--------------------------------------|------------------------------|---------------------------------|
| C <sub>max</sub> (ng/mL)             | 24.795 $\pm$ 3.647           | 492.864 $\pm$ 20.375**          |
| T <sub>max</sub> (min)               | 60.000 $\pm$ 0.000           | 15.000 $\pm$ 0.000**            |
| AUC (0-t)(ng /mL min)                | 10251.507 $\pm$ 873.663      | 45559.161 $\pm$ 695.373**       |
| AUC (0- $\infty$ )(ng /mL min)       | 10543.594 $\pm$ 977.325      | 46198.972 $\pm$ 861.735**       |
| AUMC(0-t)(min)                       | 4791797.06 $\pm$ 764578.375  | 9786219.509 $\pm$ 15829.235**   |
| AUMC(0- $\infty$ )(min)              | 6608077.256 $\pm$ 965842.653 | 12365709.34 $\pm$ 2016839.398** |
| VRT(0-t)(min <sup>2</sup> )          | 252238.617 $\pm$ 45368.609   | 177056.275 $\pm$ 28384.912**    |
| VRT(0- $\infty$ )(min <sup>2</sup> ) | 576774.774 $\pm$ 84327.327   | 392638.26 $\pm$ 73849.338**     |
| MRT (0-t)(min)                       | 467.424 $\pm$ 25.898         | 214.802 $\pm$ 15.671**          |
| MRT(0- $\infty$ )(min)               | 626.739 $\pm$ 125.783        | 267.662 $\pm$ 48.644**          |
| t <sub>1/2z</sub> (min)              | 455.955 $\pm$ 12.736         | 803.95 $\pm$ 37.984**           |
| CL <sub>z</sub> /F (L/min kg)        | 9.484 $\pm$ 0.172            | 2.165 $\pm$ 0.103**             |
| V <sub>z</sub> /F (L/kg)             | 6240.223 $\pm$ 48.792        | 2511.096 $\pm$ 85.798**         |

\*  $P < 0.05$ , indicates significant differences from the MG.

\*\*  $P < 0.01$ , indicates highly significant differences from the MG.

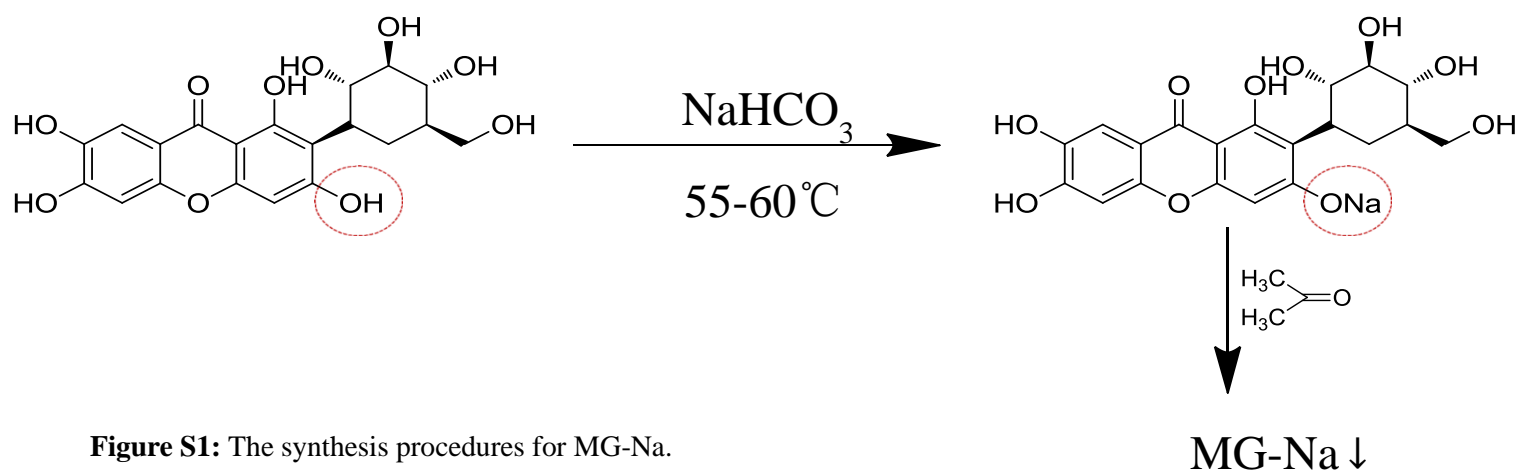

**Figure S1:** The synthesis procedures for MG-Na.

MG

MG-Na

Carbamazepine

RT: 0.00-12.01

RT: 0.00-12.01

RT: 0.00-12.01

RT: 4.55  
AA: 2050  
SN: 69

A

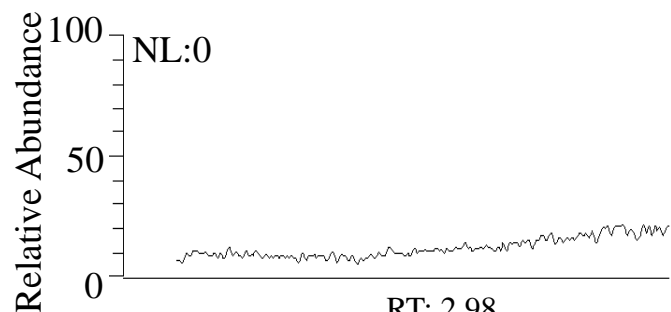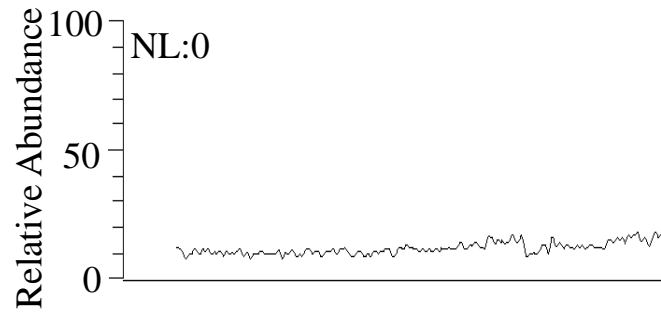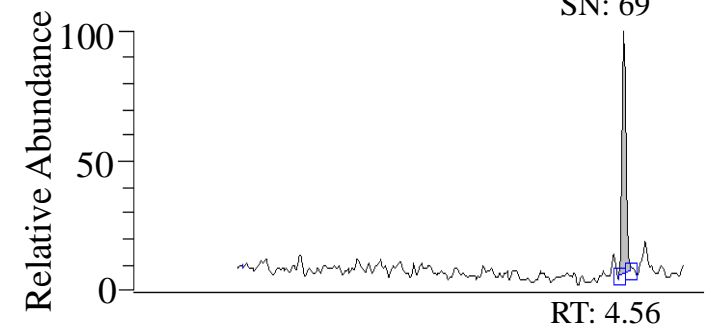

B

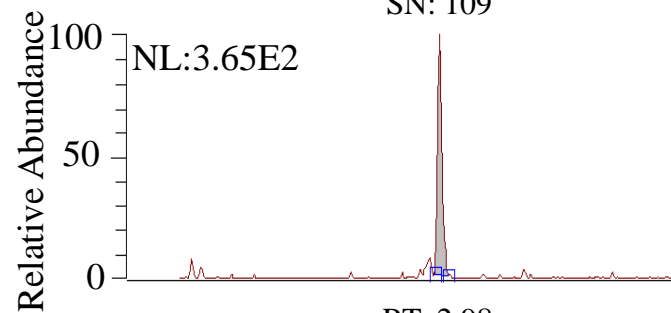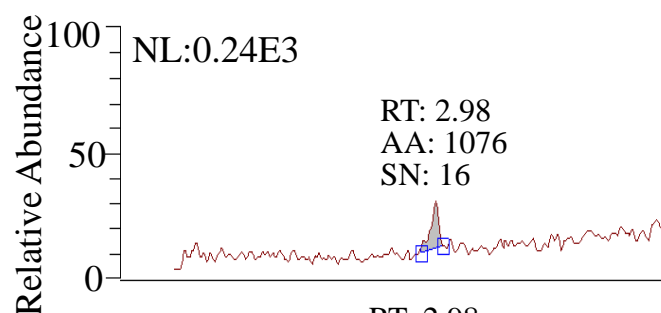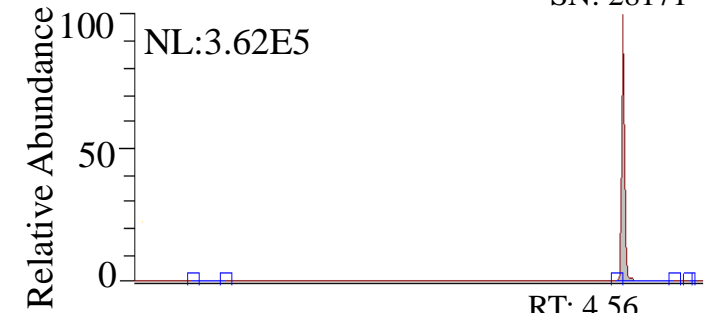

C

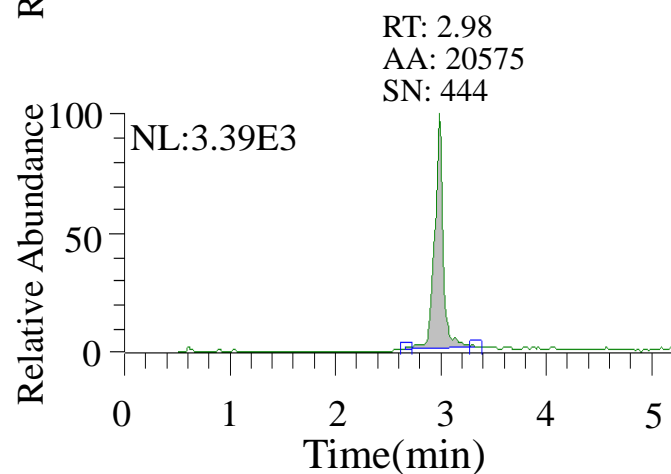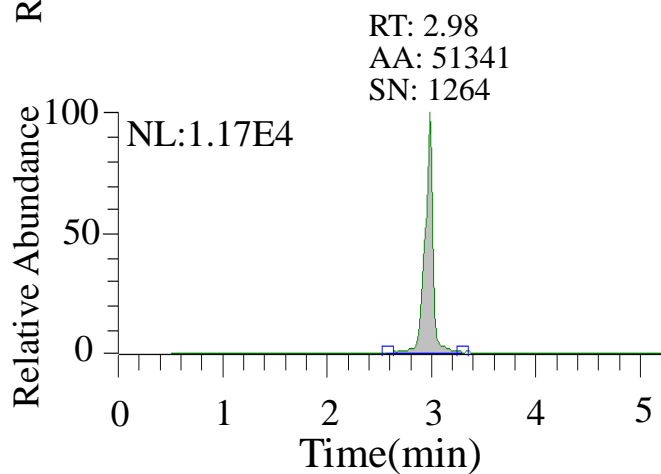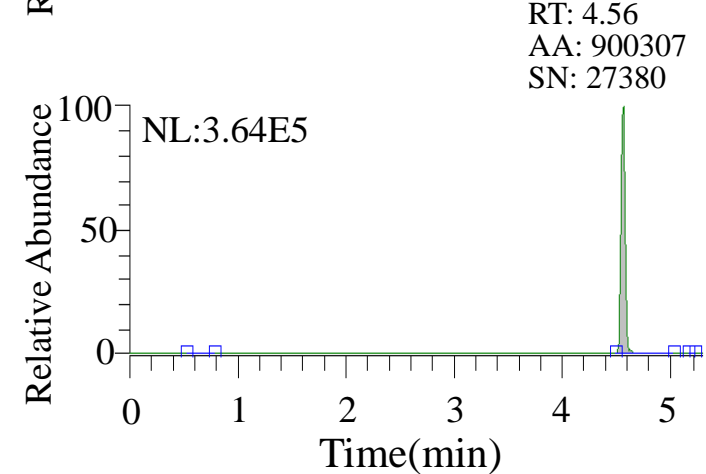

RT: 2.98  
AA: 831  
SN: 109

RT: 2.98  
AA: 1076  
SN: 16

RT: 2.98  
AA: 20575  
SN: 444

RT: 2.98  
AA: 51341  
SN: 1264

RT: 4.56  
AA: 915034  
SN: 28171

RT: 4.56  
AA: 900307  
SN: 27380

**Figure S2:** Blank plasma (A), blank plasma + standard solution of MG or MG-Na (LLOQ, 1.0 ng/mL) + IS standard working solution (100 ng/mL) (B), plasma after oral administration MG or MG-Na for 120 minutes (C)

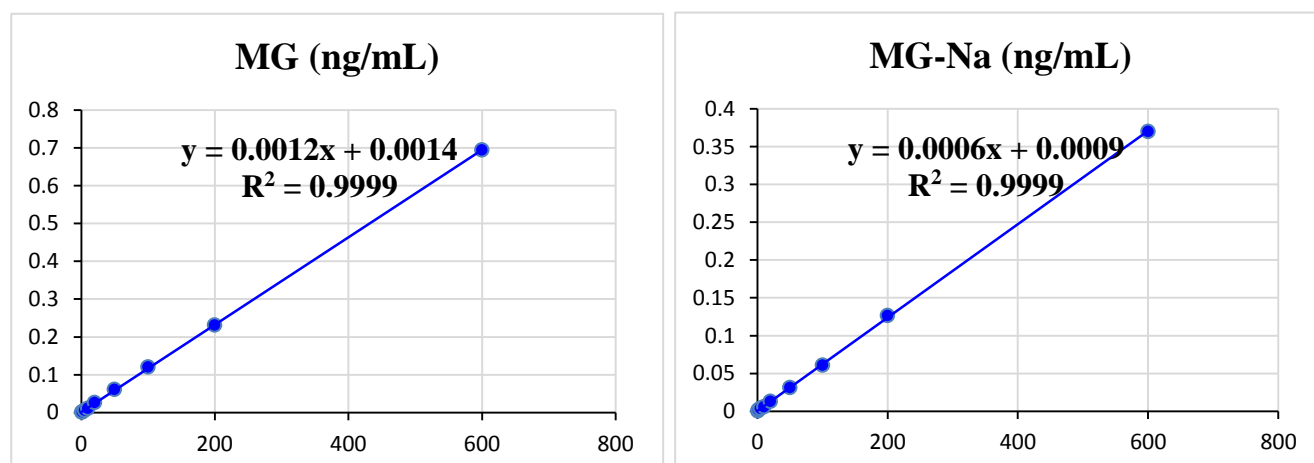

**Figure S3:** The calibration curves of MG and MG-Na (ng/mL).

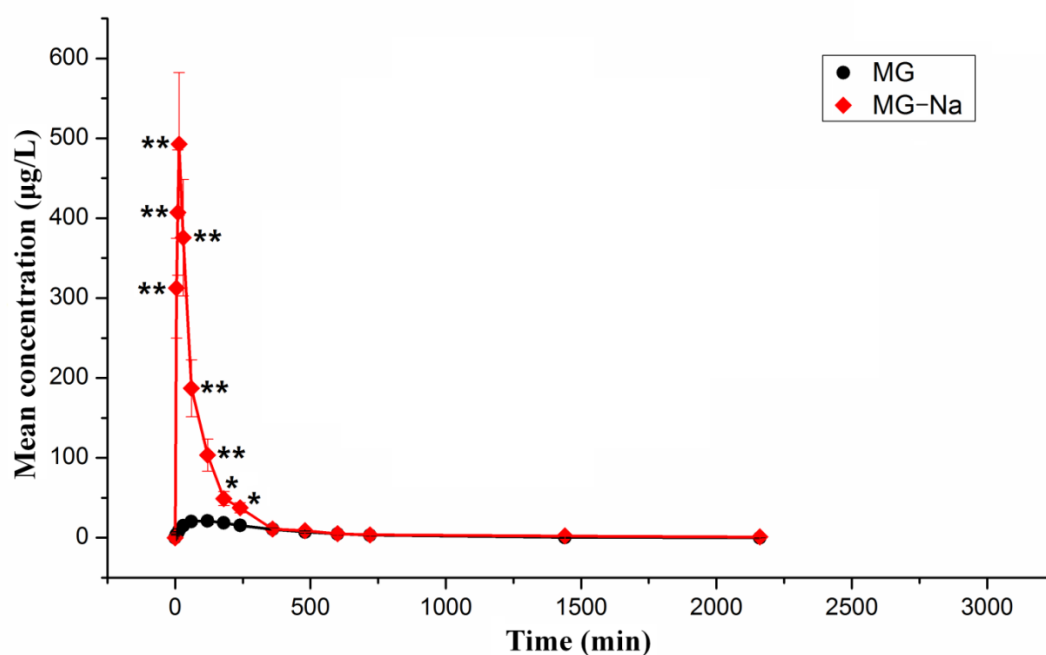

**Figure S4:** The plasma concentration-time curve of MG and MG-Na in a single one. \*  $P < 0.05$ , indicates significant differences from the MG; \*\*  $P < 0.01$ , indicates highly significant differences from the MG.
